# Supplementary material for: Preoperative language mapping by repetitive navigated transcranial magnetic stimulation and diffusion tensor imaging fiber tracking and their comparison to intraoperative stimulation
Source: Springer Nature journal article supplement (doi:10.1007/s00234-016-1685-y), 2016-04-14
Supplement: MOESM2 [file 10018142]

| Definition | Result of rTMS | Result of rTMS-based DTI FT | Result of DCS |
| --- | --- | --- | --- |
| rTMS vs. DCS | | | |
| TP | + | n. a. | + |
| TN | - | n. a. | - |
| FP | + | n. a. | - |
| FN | - | n. a. | + |
| rTMS-based DTI FT vs. DCS | | | |
| TP | n. a. | + | + |
| TN | n. a. | - | - |
| FP | n. a. | + | - |
| FN | n. a. | - | + |
| (rTMS and rTMS-based DTI FT) vs. DCS | | | |
| TP | + | + | + |
| TN | - | - | - |
| FP | + | + | - |
| - | + | - |
| + | - | - |
| FN | - | - | + |
| - | + | + |
| + | - | + |

**Supplementary Table 2: Definition of receiver operating characteristics (ROC) criteria**

This table provides the definitions for the calculation of true positive (TP), true negative (TN), false positive (FP), and false negative (FN) fractions for all comparisons. Results of the three different modalities can be language-positive (+), language-negative (-), or not applicable (n. a.).
